# Supplementary material
Source: publisher figshare collection journal article supplement (https://frontiersin.figshare.com/ndownloader/files/17291840)
Supplement: Supplementary file [file 17291840]

## Supplementary Material

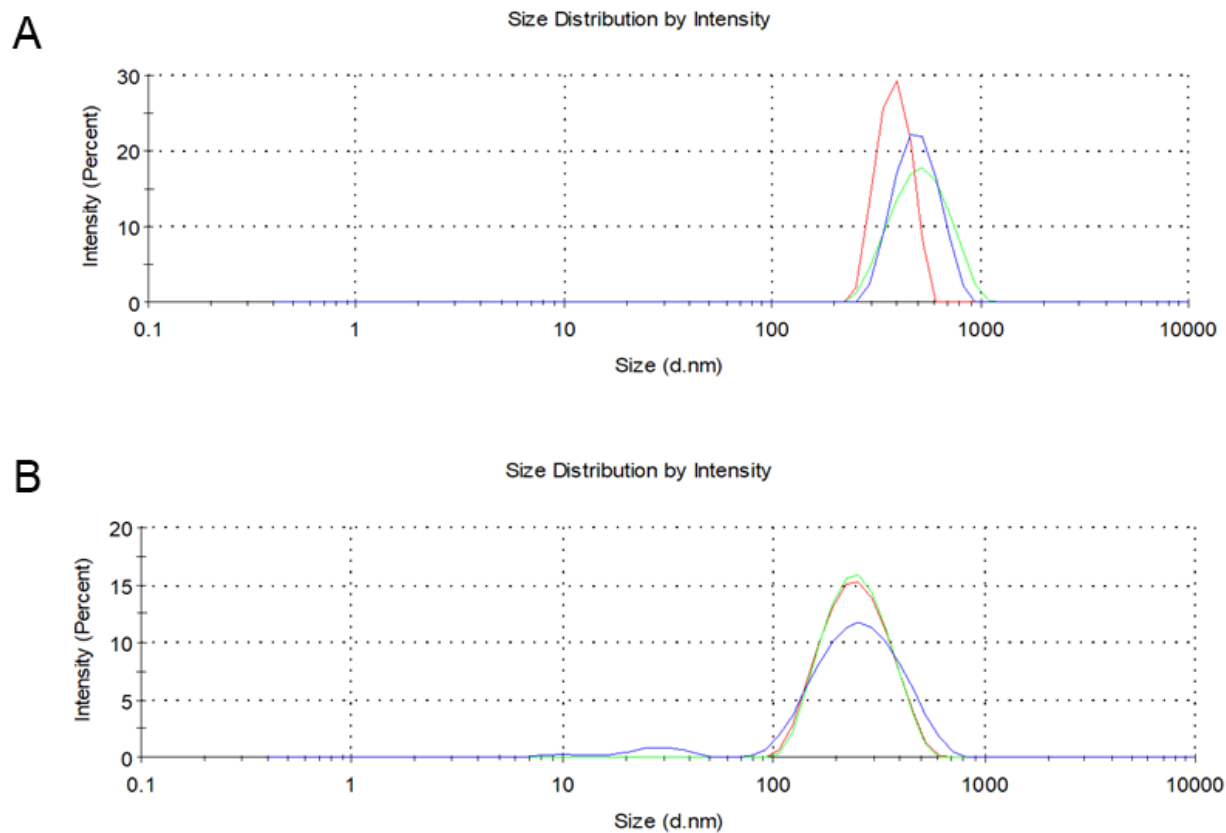

**Supplementary Figure 1.** Dynamic Light Scattering size (diameter: d) distribution by intensity of Fe<sub>2</sub>O<sub>3</sub> (A) and TiO<sub>2</sub> NPs (B) (each curve represents an independent experiment, n=3).
